# Supplementary material for: Plakophilin 1 suppresses keratinocyte innate immune responses through DExD/H helicases
Source: Research Square preprint supplement (doi:10.21203/rs.3.rs-7582528/v1), 2025-12-12
Supplement: Supplementary file 1 [file 3e7550cde36516114f35970a.pdf]

**Figure S1**

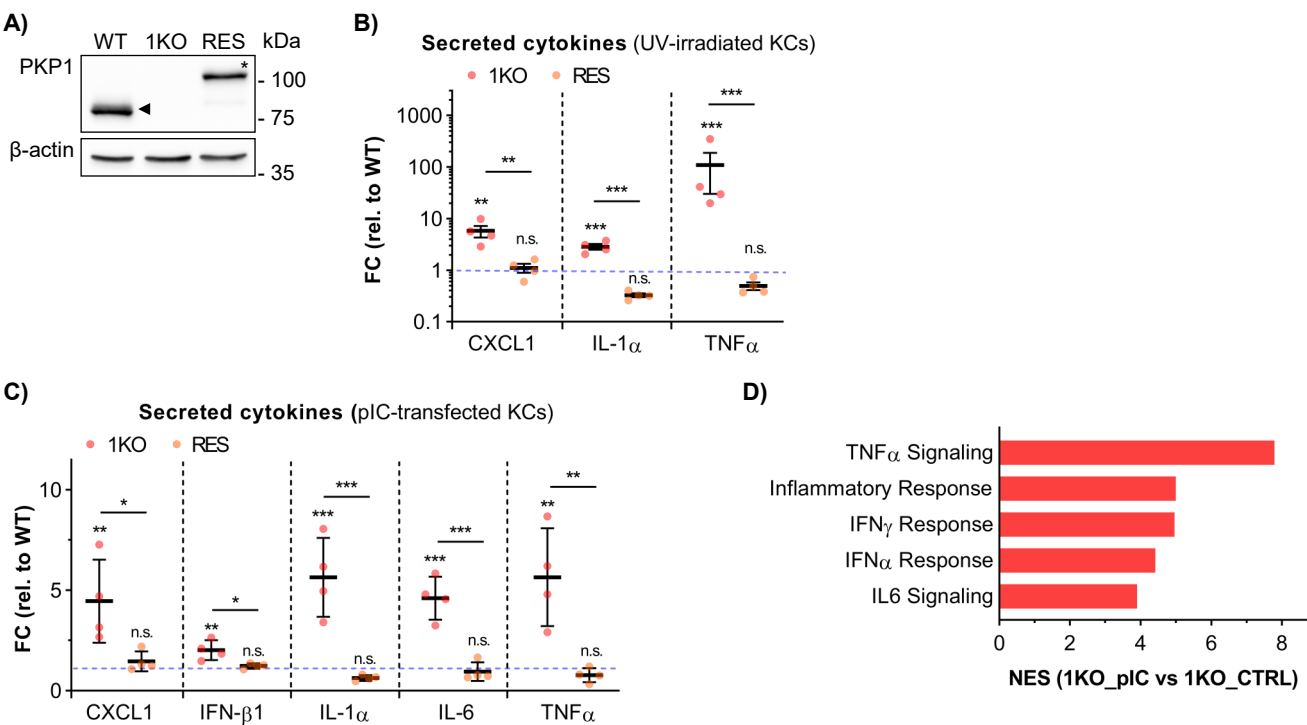

Figure S2

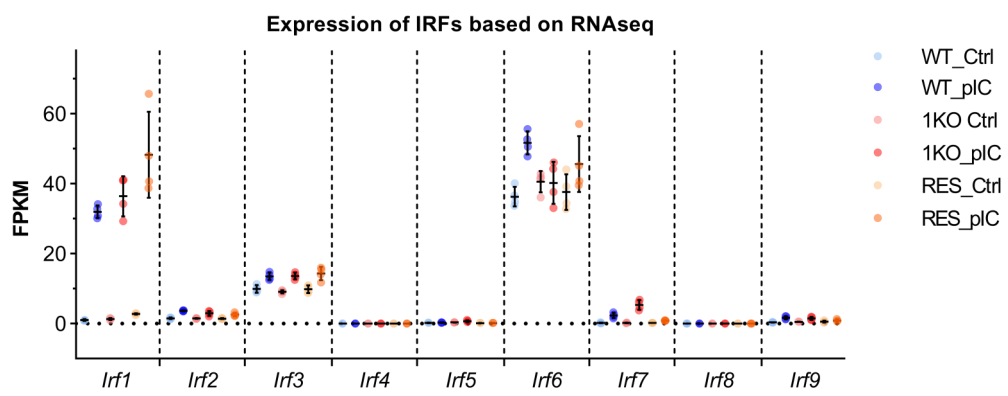

**Figure S3**

**A)**

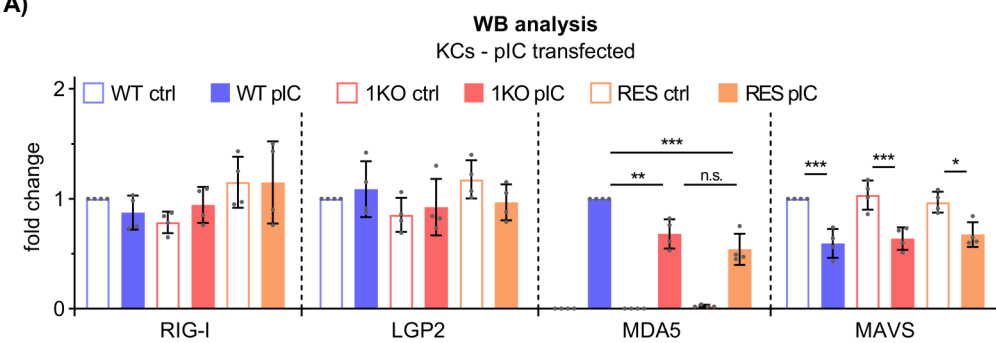

**B)**

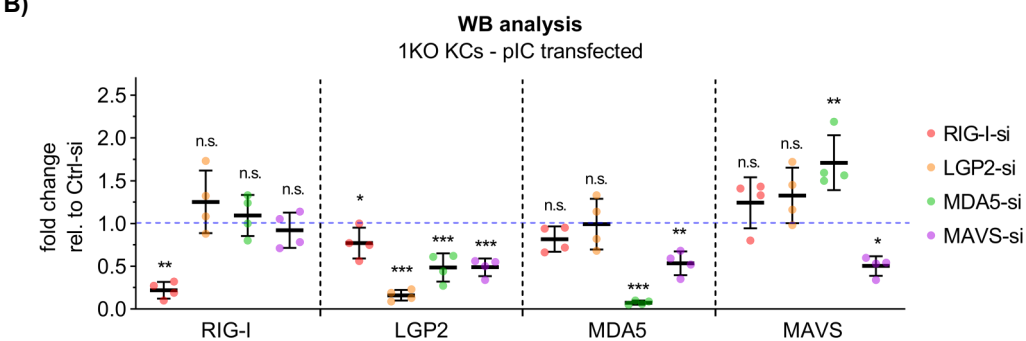

**Figure S4**

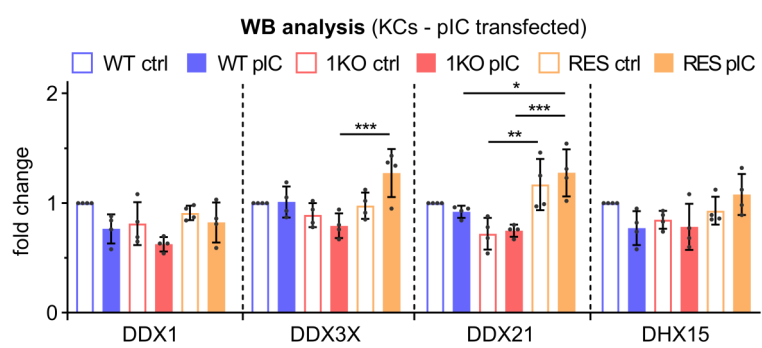

Figure S5

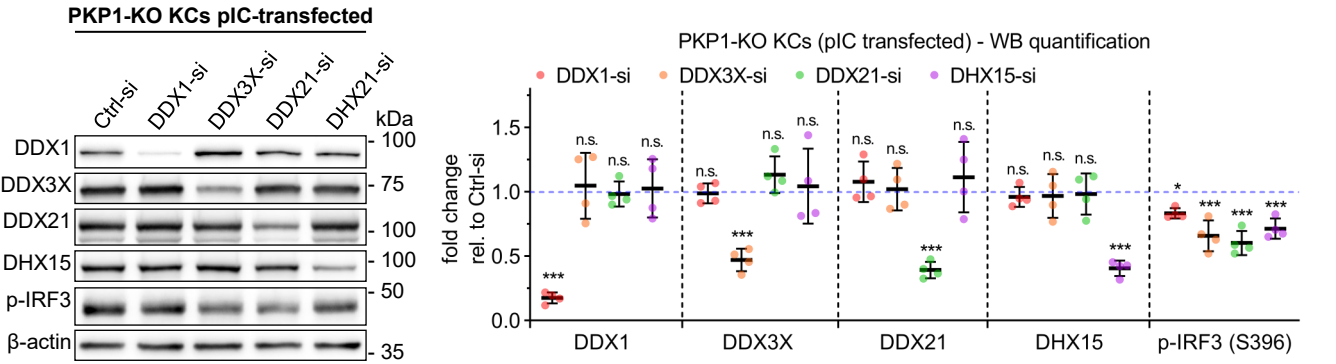

Figure S6

A)

PKP1 - phosphorylation sites

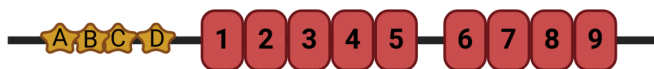

Motive A: RQK<sup>S54</sup>K<sup>S56</sup>S<sup>S57</sup>Q<sup>S59</sup>S<sup>S60</sup>T<sup>T61</sup>L<sup>S63</sup>H<sup>S65</sup>NRG<sup>S69</sup>

Motive B: DNYNYG<sup>T82</sup>T<sup>S84</sup>RSSYY

Motive C: DNRRF<sup>S118</sup>S<sup>S119</sup>Y<sup>S121</sup>QMENW<sup>S127</sup>RHYPR

Motive D: RG<sup>T166</sup>LRKG<sup>T171</sup>LG<sup>S174</sup>KGQK<sup>T179</sup>T<sup>T180</sup>QNRYS<sup>S185</sup>FYS<sup>S188</sup>T<sup>T189</sup>CS<sup>S191</sup>G

B)

PKP1-WT-EGFP

PKP1-4xA-EGFP

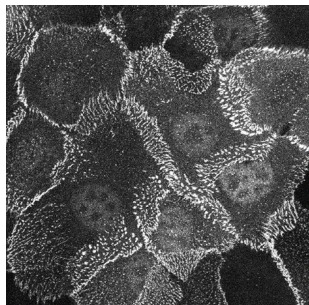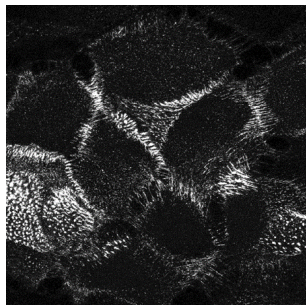

**Figure S1:** Loss of PKP1 increases secretion of pro-inflammatory cytokines. **(A)** Western blot analysis of WT, PKP1-KO (1KO) and PKP1-rescue (RES) KCs to depict PKP1 expression. Endogenous PKP1 (~ 82 kDa) is indicated by an arrowhead. PKP1-WT-EGFP (~ 136 kDa) expressed in PKP1-KO KCs (RES) is marked with an asterisk. **(B)** WT, PKP1-KO (1KO) and PKP1-rescue (RES) KCs where exposed to UV. After 24h the medium was collected to quantify the amounts of secreted CXCL1, IL-1 $\alpha$ , and TNF $\alpha$  using ELISA. Depicted are the mean fold changes ( $\pm$  SD) of secreted cytokines upon UV-treatment relative to WT cells (n = 4). **(C)** WT, PKP1-KO (1KO) and PKP1-rescue (RES) KCs where transfected with pIC. After 24h the medium was collected to quantify the amounts of secreted CXCL1, IFN- $\beta$ 1, IL-1 $\alpha$ , IL-6, and TNF $\alpha$  using ELISA. Depicted are the mean fold changes ( $\pm$  SD) of secreted cytokines upon pIC stimulation relative to WT cells (n = 4). **(D)** Normalized enrichment scores (NES) for the top 5 “mouse-ortholog hallmark” gene sets as determined by gene set enrichment analysis (GSEA). GSEA was performed using a gene list ranked by fold change expression between pIC-transfected PKP1-KO (1KO) and untreated 1KO KCs.

**Figure S2:** Expression of IRF family members in mouse KCs. mRNA level (FPKM, fragments per kilobase per million mapped reads) of IRFs in untreated (Ctrl) and pIC-transfected WT, PKP1-KO (1KO) and PKP1-rescue (RES) KCs based on RNA-seq data.

**Figure S3:** WB analysis of RLR signaling pathway. **(A)** Quantification of protein amounts derived from Western blot analysis of pIC transfected WT, 1KO and RES KCs shown in Fig. 5B. Depicted are the fold changes ( $\pm$  SD) of  $\beta$ -actin-normalized protein amounts in untreated (ctrl) and pIC transfected KCs relative to untreated (RIG-I, LGP2, MAVS) or pIC- (MDA5) transfected WT KCs (n = 4). **(B)** Quantification of protein amounts derived from Western blot analysis of 1KO KCs transfected with the indicated siPools prior to pIC stimulation. Depicted are the fold changes ( $\pm$  SD) of the respective protein amounts normalized to  $\beta$ -actin and relative to control siPool transfected 1KO KCs (blue dotted line; n = 4, related to Fig. 5C). Statistical significances were

determined by one-way ANOVA with Tukey's multiple comparison. n.s. = not significant; \*  $p < 0.05$ ; \*\*  $p < 0.01$ ; \*\*\*  $p < 0.001$ .

**Figure S4.** Quantification of DExD/H-box helicase expression in pIC transfected WT, 1KO and RES KCs. Quantification of protein amounts from immunoblots of DExD/H-box helicases.  $\beta$ -actin was used as loading control. Depicted are the fold changes ( $\pm$  SD) of the respective protein amounts in untreated and pIC transfected KCs normalized to  $\beta$ -actin and relative to untreated WT KCs ( $n = 4$ , related to Fig. 6D). Statistical significances were determined by one-way ANOVA with Tukey's multiple comparison. n.s. = not significant; \*  $p < 0.05$ ; \*\*  $p < 0.01$ ; \*\*\*  $p < 0.001$ .

**Figure S5.** Efficiency of DExD/H-box helicase knock down. Western blot analysis of 1KO KCs transfected with the indicated siPools prior to pIC stimulation. Left: Representative immunoblots of DExD/H-box helicases.  $\beta$ -actin was used as loading control. Right: Quantification of protein amounts. Depicted are the fold changes ( $\pm$  SD) of the respective protein amounts normalized to  $\beta$ -actin and relative to control siPool transfected 1KO KCs (blue dotted line;  $n = 4$ ). Statistical significances were determined by one-way ANOVA with Tukey's multiple comparison. n.s. = not significant; \*  $p < 0.05$ ; \*\*  $p < 0.01$ ; \*\*\*  $p < 0.001$ .

**Figure S6.** A PKP1 mutant covering several phosphorylation sites localizes to desmosomes. **(A)** Scheme showing the four motives in the head-domain of PKP1 that regulate its localization through phosphorylation. **(B)** Fluorescence images of PKP1-KO KCs either expressing PKP1-WT-EGFP or PKP1-4xA-EGFP incubated for 24h in HCM. Exchange of all serine and threonine residues depicted in (A) to alanine locks PKP1 at cell-cell contacts.



**Table S1: List of used siPools (defined pools of 30 selected siRNAs) obtained from siTools Biotech GmbH**

| Target                            | NCBI Gene ID |
|-----------------------------------|--------------|
| non-targeting control             | N/A          |
| murine <i>Ddx1</i>                | 104721       |
| murine <i>Ddx3x</i>               | 13205        |
| murine <i>Dhx15</i>               | 13204        |
| murine <i>Ddx21</i>               | 56200        |
| murine <i>Rela</i> (p65)          | 19697        |
| murine <i>Irf3</i>                | 54131        |
| murine <i>Mavs</i>                | 228607       |
| murine <i>Ifih1</i> (MDA5)        | 71586        |
| murine <i>Dhx58</i> (LGP2)        | 80861        |
| murine <i>Ddx21</i>               | 56200        |
| murine <i>Rigi</i> (RIG-I, DDX58) | 230073       |

**Table S2: List of used ELISA kits**

| ELISA-Kit                                   | Source      | Identifier     |
|---------------------------------------------|-------------|----------------|
| ELISA MAX™ Standard Set Mouse IL-1 $\alpha$ | BioLegend   | Cat# 433401    |
| ELISA MAX™ Standard Set Mouse IL-6          | BioLegend   | Cat# 431301    |
| ELISA MAX™ Standard Set Mouse TNF- $\alpha$ | BioLegend   | Cat# 430901    |
| Mouse CXCL1/KC DuoSet ELISA                 | R&D Systems | Cat# DY453-05  |
| Mouse IFN-beta DuoSet ELISA                 | R&D Systems | Cat# DY8234-05 |

**Table S3: Primary antibodies including dilutions in Western Blot (WB), immunofluorescence (IF) or proximity ligation assay (PLA)**

| <b>Antibody</b>                                              | <b>Source</b>             | <b>Identifier</b>        | <b>Dilution</b>            |
|--------------------------------------------------------------|---------------------------|--------------------------|----------------------------|
| c-Myc (D84C12) Rabbit mAb                                    | Cell Signaling Technology | RRID: AB_1903938         | 1:1000 (WB)                |
| DDX1 (A-7) Mouse mAb                                         | Santa Cruz Biotechnology  | RRID: AB_10650122        | 1:500 (WB)<br>1:250 (PLA)  |
| DDX21 Rabbit pAb                                             | Cell Signaling Technology | RRID: n.a.<br>Cat# 75762 | 1:1000 (WB)<br>1:500 (PLA) |
| DDX3 (D19B4) Rabbit mAb                                      | Cell Signaling Technology | RRID: AB_10860416        | 1:1000 (WB)<br>1:500 (PLA) |
| DHX15 (E-6) Mouse mAb                                        | Santa Cruz Biotechnology  | RRID: AB_10707990        | 1:1000 (WB)<br>1:500 (PLA) |
| GFP Rabbit pAb                                               | Rockland                  | RRID: AB_828167          | 1:2000 (WB)                |
| IRF-3 (D83B9) Rabbit mAb                                     | Cell Signaling Technology | RRID: AB_1904036         | 1:500 (WB)                 |
| LGP2 Rabbit pAb                                              | Thermo Fisher Scientific  | RRID: AB_2855046         | 1:1000 (WB)                |
| MAVS (E8Z7M) Rabbit mAb #83000                               | Cell Signaling Technology | RRID: AB_2927715         | 1:2000 (WB)                |
| MDA-5 (D74E4) Rabbit mAb #5321                               | Cell Signaling Technology | RRID: AB_10694490        | 1:1000 (WB)                |
| NF- $\kappa$ B p65 (D14E12) XP <sup>®</sup> Rabbit mAb #8242 | Cell Signaling Technology | RRID: AB_10859369        | 1:2000 (WB)<br>1:1000 (IF) |
| Phospho-IRF-3 (Ser396) (D6O1M) Rabbit mAb #29047             | Cell Signaling Technology | RRID:AB_2773013          | 1:500 (WB)                 |
| Phospho-NF- $\kappa$ B p65 (Ser536) (93H1) Rabbit mAb #3033  | Cell Signaling Technology | RRID: AB_331284          | 1:1000 (WB)                |
| PKP1 (10B2) Mouse mAb #sc-33636                              | Santa Cruz Biotechnology  | RRID: AB_2164139         | 1:1000 (WB)                |
| PKP1 Rabbit (serum)                                          | Hatzfeld Lab              | (1,2)                    | 1:1000 (PLA)               |
| RIG-I (D14G6) Rabbit mAb #3743                               | Cell Signaling Technology | RRID: AB_2269233         | 1:1000 (WB)<br>1:500 (PLA) |
| $\beta$ -actin Mouse mAb #A2228                              | Sigma-Aldrich             | RRID: AB_476697          | 1:2000 (WB)                |

**Table S4: List of secondary antibodies including dilutions in immunoblot (IB) and immunofluorescence (IF)**

| Antibody                                                                                  | Source                            | Identifier        | Dilution         |
|-------------------------------------------------------------------------------------------|-----------------------------------|-------------------|------------------|
| Peroxidase-AffiniPure<br>Donkey Anti-Mouse IgG                                            | Jackson<br>ImmunoResearch<br>Labs | RRID: AB_2340770  | 1:20,000<br>(WB) |
| Peroxidase-AffiniPure<br>Donkey Anti-Rabbit IgG                                           | Jackson<br>ImmunoResearch<br>Labs | RRID: AB_10015282 | 1:40,000<br>(WB) |
| Alexa Fluor® 488<br>AffiniPure F(ab') <sub>2</sub><br>Fragment Donkey Anti-<br>Rabbit IgG | Jackson<br>ImmunoResearch<br>Labs | RRID: AB_2340619  | 1:500 (IF)       |

**Table S5: Sequences of primers (FW = forward primer, REV = reverse primer) used in qRT-PCR**

| Primer                  | Sequence 5' --> 3'     |
|-------------------------|------------------------|
| <i>Eef2</i> -mouse FW   | ATGAGGCCGCCATGGGTATTA  |
| <i>Eef2</i> -mouse REV  | TAGTTGGGGCCCATGATCCG   |
| <i>Cxcl1</i> -mouse FW  | AAGAATGGTCGCGAGGCTTG   |
| <i>Cxcl1</i> -mouse REV | GTGTTGTCAGAAGCCAGCGT   |
| <i>Il1a</i> -mouse FW   | GTCAACTCATTGGCGCTTGA   |
| <i>Il1a</i> -mouse REV  | TGCAAGTCTCATGAAGTGAGC  |
| <i>Il6</i> -mouse FW    | AACGATGATGCACTTGCAGAAA |
| <i>Il6</i> -mouse REV   | TGGTACTCCAGAAGACCAGAG  |
| <i>Tnf</i> -mouse FW    | GCCTATGTCTCAGCCTCTTCTC |
| <i>Tnf</i> -mouse REV   | AGGGTCTGGGCCATAGAACTG  |
| <i>Ifnb1</i> -mouse FW  | CGTGGGAGATGTCCTCAACT   |
| <i>Ifnb1</i> -mouse REV | CTGAAGATCTCTGCTCGGACC  |

1. Hatzfeld, M., Haffner, C., Schulze, K. and Venzens, U. (2000) The function of plakophilin 1 in desmosome assembly and actin filament organization. *J Cell Biol*, **149**, 209-222.
2. Wolf, A., Krause-Gruszczynska, M., Birkenmeier, O., Ostareck-Lederer, A., Huttelmaier, S. and Hatzfeld, M. (2010) Plakophilin 1 stimulates translation by promoting eIF4A1 activity. *J Cell Biol*, **188**, 463-471.
